# Supplementary material
Source: ML conference proceedings conference paper supplement (https://proceedings.neurips.cc/paper_files/paper/2007/hash/708f3cf8100d5e71834b1db77dfa15d6-Abstract.html)
Supplement: Supplementary file 1 [file 708f3cf8100d5e71834b1db77dfa15d6-Supplemental.zip]

Archive with 3 entries (3 files):
- nips2007.pdf
- spotlight.mp3
- spotlight.pdf
