# Supplementary material
Source: ML conference proceedings conference paper supplement (https://proceedings.neurips.cc/paper_files/paper/2007/hash/708f3cf8100d5e71834b1db77dfa15d6-Abstract.html)
Supplement: Supplementary file 1 [file 708f3cf8100d5e71834b1db77dfa15d6-Supplemental.zip › spotlight.pdf]

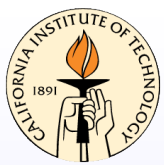

# Predicting human gaze using low-level saliency combined with face detection (W49)

HUJI

*Moran Cerf, Jonathan Harel, Wolfgang Einhäuser, Christof Koch*

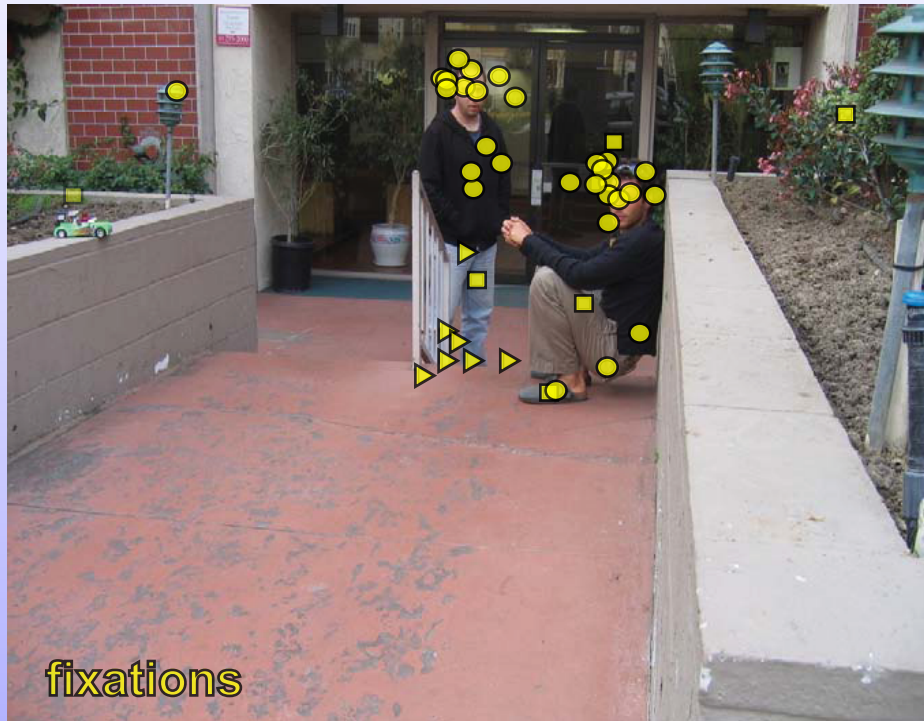

**Humans look at faces  
(early and irrespective of task)**

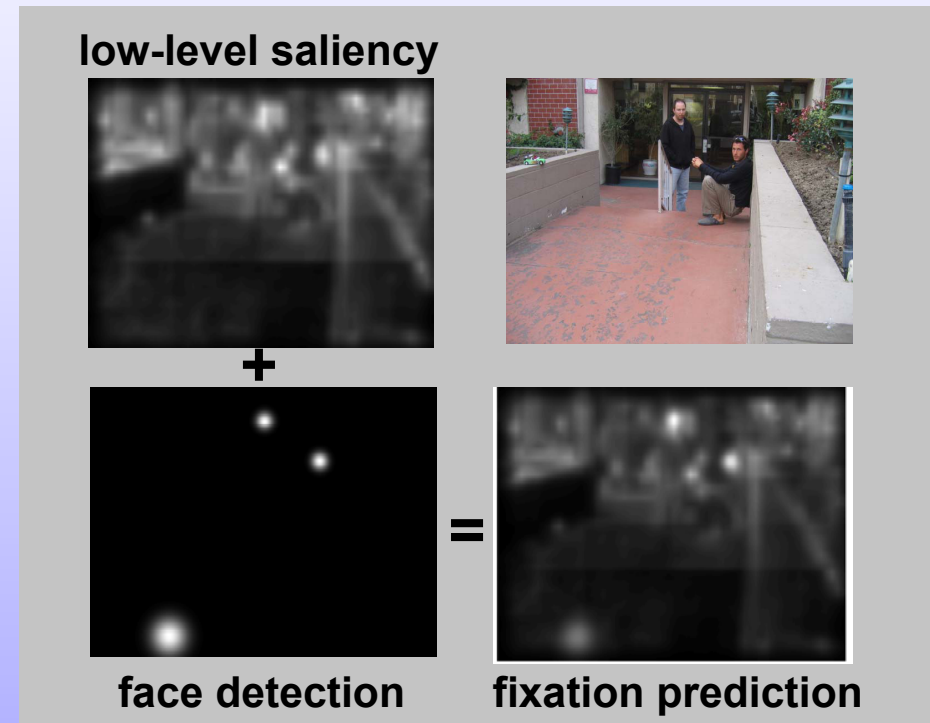

**Combined Model  
(face + low-level saliency)**

- Combined model outperforms saliency in predicting fixations.
  - Holds even **if there is no face in the image** (hallucinated faces).
- => Specialized bottom-up “face channel” for human attention.
